# Supplementary material for: Low crystallinity VOOH hollow microspheres as an outstanding high-rate and long-life cathode for sodium ion batteries
Source: Royal Society of Chemistry journal article supplement (doi:10.1039/c3ta12868g), 2013-01-01
Supplement: c3ta12868g.pdf [file c3ta12868g.pdf]

Supporting information for

**Low crystallinity VOOH hollow microspheres as outstanding high-rate and long-life cathode for sodium ion batteries**

*Jie Shao, Yuanlei Ding, Xinyong Li, Zhongming Wan, Caiyan Wu, Jiping Yang, Qunting Qu,\* and Honghe Zheng\**

School of Energy & College of Chemistry, Chemical Engineering and Material Science, Soochow University, Suzhou Jiangsu 215006, China  
E-mail: qtqu@suda.edu.cn; hhzheng@suda.edu.cn

**Experimental details**

*Synthesis of VOOH and V<sub>2</sub>O<sub>5</sub> hollow microspheres:* The V(OH)<sub>2</sub>NH<sub>2</sub> solid precursors were first prepared according to the method reported in literature with minor modification.<sup>[30]</sup> Briefly, 2 mmol of NH<sub>4</sub>VO<sub>3</sub> and 1 mL of HCl (1 mol·L<sup>-1</sup>) were dissolved in 45 mL of H<sub>2</sub>O to obtain a yellow transparent solution. Subsequently, 3 mL of hydrazine (N<sub>2</sub>H<sub>4</sub>·H<sub>2</sub>O) was introduced into the above solution dropwise, which was further stirred at room temperature for 30 min. The yellow transparent solution became gray and turbid. At last, the V(OH)<sub>2</sub>NH<sub>2</sub>-containing suspensions were directly transferred into an autoclave and hydrothermally treated at 120°C for 4h. The VOOH precipitate was collected by centrifuging and washing. High crystalline V<sub>2</sub>O<sub>5</sub> hollow microspheres were obtained via calcination of VOOH at 350°C in air for 3h.

*Characterization methods:* The morphology, microstructure, and composition of the materials were investigated by FE-SEM (Hitachi SU8000), TEM (Philips EM 420), XRD (Bruker D4), XPS (VG ESCA 2000), and FTIR (Nicolet 730).

*Electrochemical testing:* The working electrode slurry was prepared by dispersing the

mixture of VOOH or  $V_2O_5$ , Super P-Li, and poly(vinylidene fluoride) (PVDF) binder with a weight ratio of 7/2/1 in N-methylpyrrolidone. The slurry was spread onto aluminum foil disks and dried in a vacuum oven at 120 °C overnight. The mass loading of active material on each electrode is about  $1\text{ mg cm}^{-2}$ . Na foil as the counter and reference electrodes, and  $1\text{ mol L}^{-1}$   $\text{NaClO}_4$  dissolved in propylene carbonate (PC) solvent as the electrolyte, Celgard 2500 as the separator, were used to assemble a CR2032 coin cell. Galvanostatic discharge and charge tests were performed with a cycle tester from LAND Electronic Co. The cyclic voltammograms were obtained using ZAHNER Electrochemical Workstation IM6.

### Supplementary figures

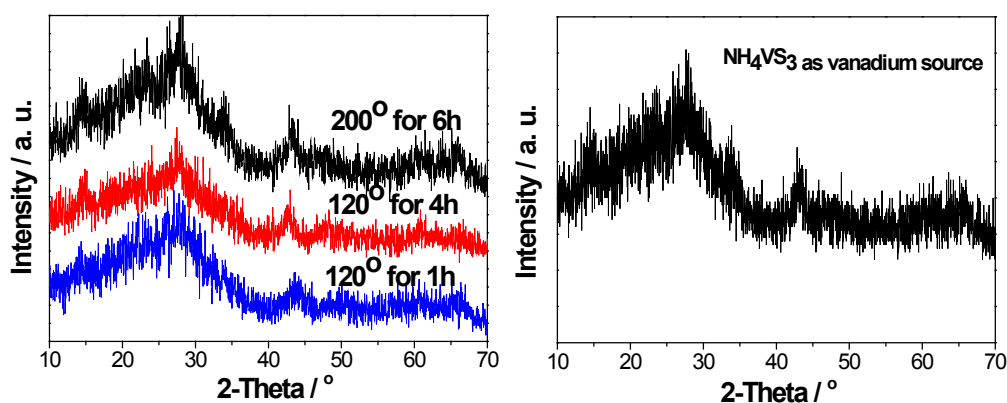

Figure S1 XRD patterns of VOOH hollow microspheres prepared at different hydrothermal conditions or using different vanadium sources.

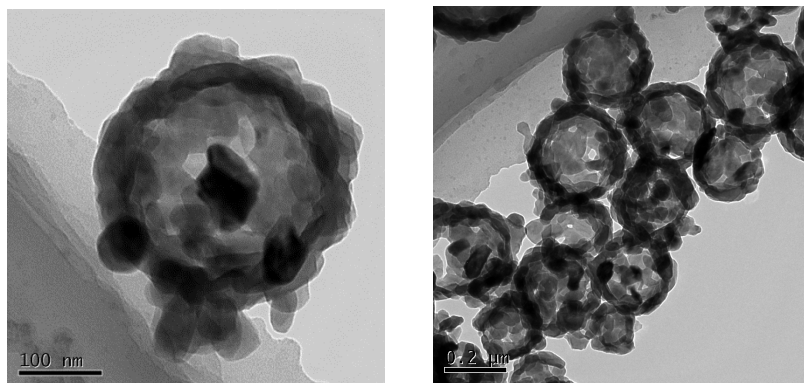

Figure S2 TEM images of high crystallinity V<sub>2</sub>O<sub>5</sub> hollow microspheres.

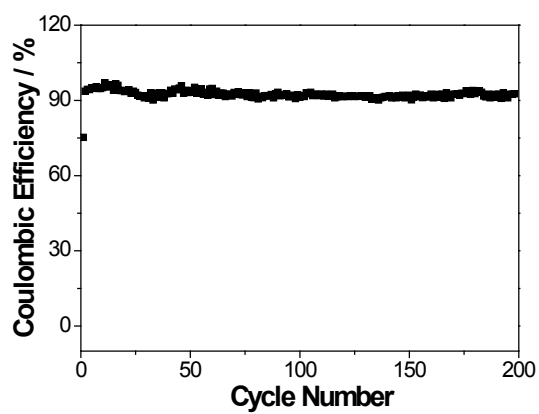

Figure S3 Coulombic efficiency of the VOOH microspheres electrode during long-term cycles.

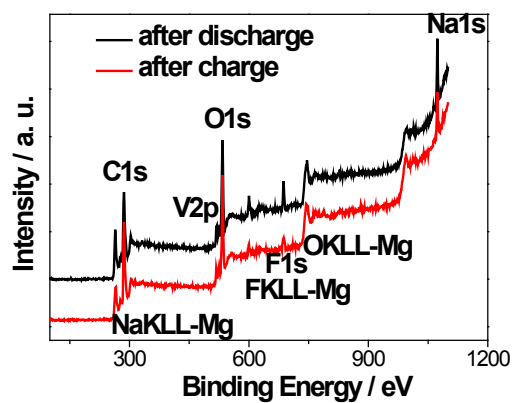

Figure S4 Survey XPS spectra of VOOH electrodes after cycling.
